# Supplementary material for: Light-stimulus intensity modulates startle reflex habituation in larval zebrafish
Source: PubMed Central journal article supplement (PMC8599482; doi:10.1038/s41598-021-00535-9), 2021-11-17
Supplement: 41598_2021_535_MOESM1_ESM.pdf [file 41598_2021_535_MOESM1_ESM.pdf]

| Run | Control |         |        | Stimulated |         |        |
|-----|---------|---------|--------|------------|---------|--------|
|     | kLux    | M       | SE     | kLux       | M       | SE     |
| 1   | 0       | 18.6152 | 1.4967 | 0.5        | 18.8579 | 1.6165 |
| 2   | 0       | 16.6668 | 1.3574 | 1          | 15.7123 | 1.2247 |
| 3   | 0       | 19.3005 | 1.6278 | 2          | 18.2873 | 1.4691 |
| 4   | 0       | 16.3719 | 1.365  | 4          | 19.512  | 1.5657 |
| 5   | 0       | 13.5732 | 1.2615 | 6          | 18.8759 | 1.5465 |
| 6   | 0       | 16.6505 | 1.2954 | 8          | 21.0003 | 1.5962 |
| 7   | 0       | 14.3241 | 1.2818 | 10         | 22.3410 | 1.655  |
| 8   | 0       | 13.797  | 1.3492 | 12         | 25.1261 | 1.6607 |
| 9   | 0       | 15.4862 | 1.1103 | 14         | 24.5054 | 1.8124 |
| 10  | 0       | 17.141  | 1.2418 | 16         | 27.6797 | 1.7715 |

**Table 1.** Descriptive statistics (mean and SE) for the mean TDT<sub>20</sub> for each group, at each level of the within-subject factor (light stimulus intensity).
